# Supplementary material for: Highly Bright Silica-Coated InP/ZnS Quantum Dot-Embedded Silica Nanoparticles as Biocompatible Nanoprobes
Source: MDPI journal article supplement (doi:10.3390/ijms231810977), 2022-09-19
Supplement: s1 [file s1]

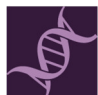

# Highly bright silica-coated InP/ZnS quantum dot-embedded silica nanoparticles as biocompatible nanoprobe

Kyeong-Min Ham<sup>1,†</sup>, Minhee Kim<sup>1,†</sup>, Sungje Bock<sup>1</sup>, Jaehi Kim<sup>1</sup>, Wooyeon Kim<sup>1</sup>, Heung Su Jung<sup>2</sup>, Jaehyun An<sup>1,3</sup>, Hobeom Song<sup>3</sup>, Jung-Won Kim<sup>3</sup>, Hyung-Mo Kim<sup>1,4</sup>, Won-Yeop Rho<sup>5</sup>, Sang-Hun Lee<sup>6</sup>, Seung-min Park<sup>7</sup>, Dong-Eun Kim<sup>1,\*</sup> and Bong-Hyun Jun<sup>1,\*</sup>

<sup>1</sup> Department of Bioscience and Biotechnology, Konkuk University, Seoul 05029, Republic of Korea

<sup>2</sup> Company of Global Zeus, Hwaseong, Gyeonggi-do 18363, Republic of Korea

<sup>3</sup> Company of BioSquare, Hwaseong, Gyeonggi-do 18449, Republic of Korea

<sup>4</sup> KIURI Research Center, Ajou University, Suwon, Gyeonggi-do 16499, Republic of Korea

<sup>5</sup> School of International Engineering and Science, Jeonbuk National University, Jeonju 54896, Korea

<sup>6</sup> Department of Chemical and Biological Engineering, Hanbat University, Daejeon 34158, Republic of Korea

<sup>7</sup> Department of Urology, Stanford University School of Medicine, Stanford, 94305, United States

\* Correspondence: kimde@konkuk.ac.kr (D.-E.K.), bjun@konkuk.ac.kr (B.-H.J.)

† K.-M.H. and M.K. contributed equally to this work

Received: date; Accepted: date; Published: date

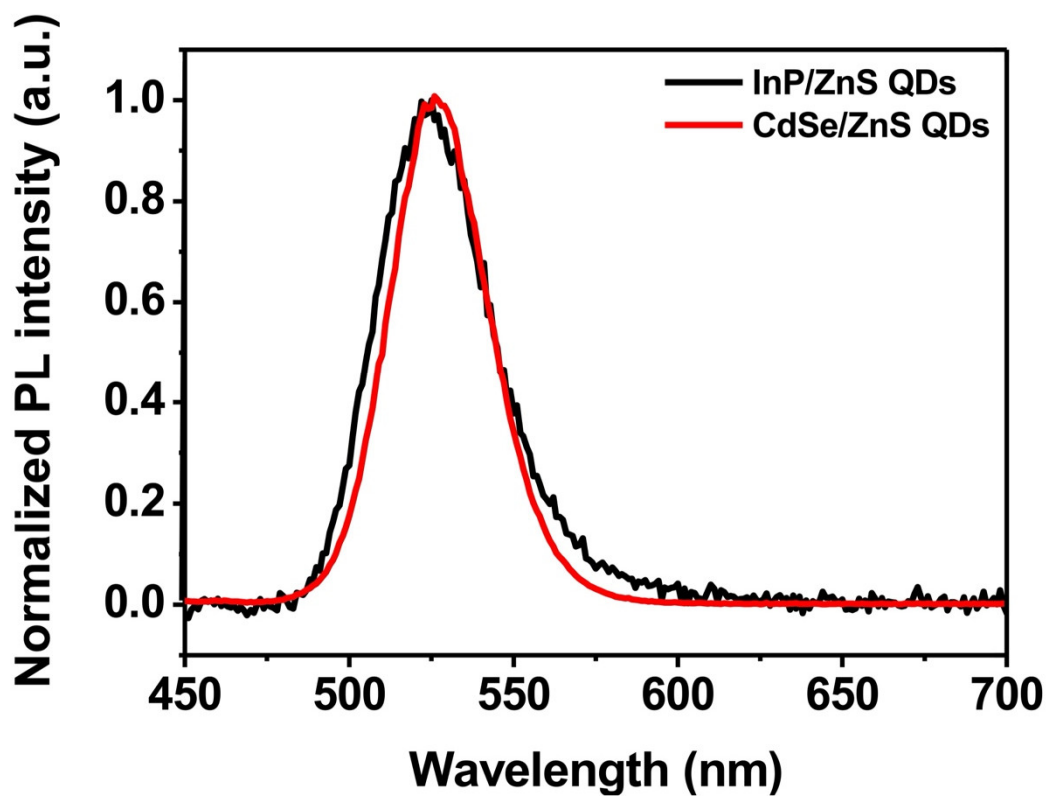

**Figure S1.** Comparison photoluminescence (PL) spectra between InP/ZnS QDs and CdSe/ZnS QDs.

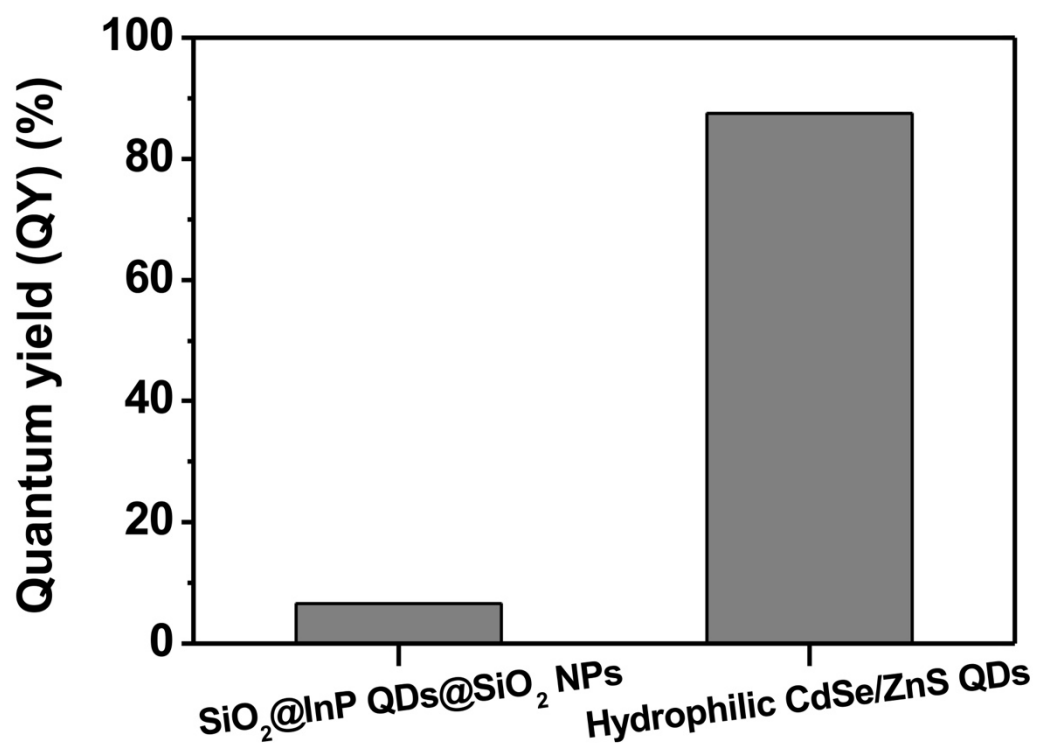

**Figure S2.** Comparison of quantum yield (QY) of SiO<sub>2</sub>@InP QDs@SiO<sub>2</sub> NPs and hydrophilic CdSe/ZnS QDs. The QY of SiO<sub>2</sub>@InP QDs@SiO<sub>2</sub> NPs and hydrophilic CdSe/ZnS QDs were 6.61% and 87.52%, respectively.

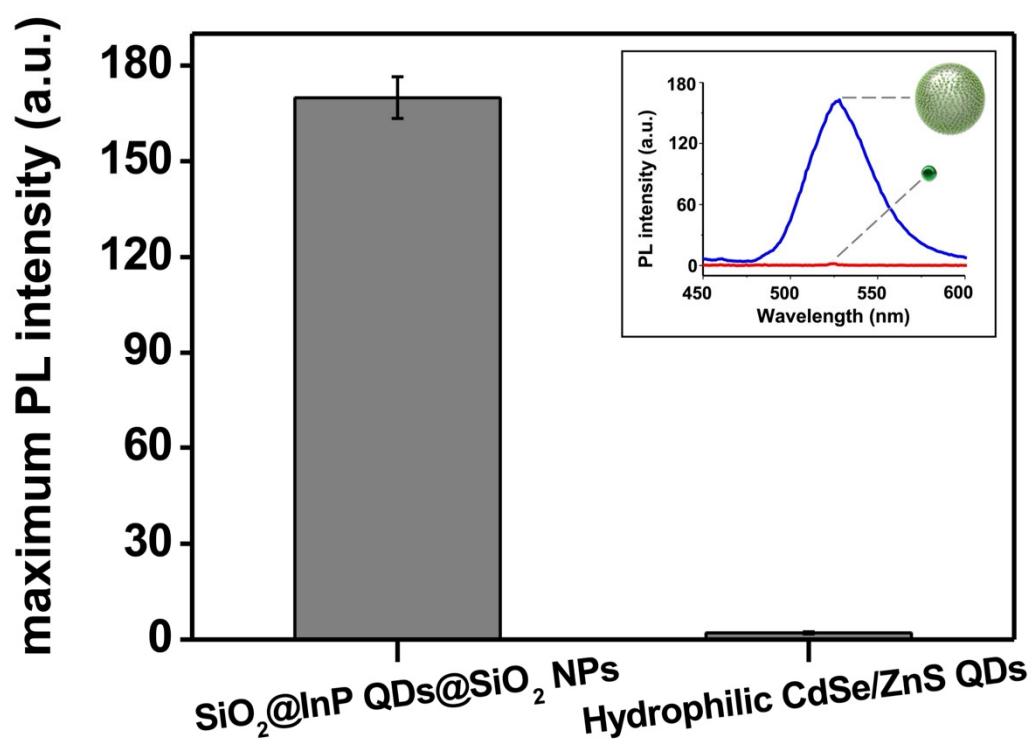

**Figure S3.** Comparison of PL intensity between SiO<sub>2</sub>@InP QDs@SiO<sub>2</sub> NPs and hydrophilic CdSe/ZnS QDs. The maximum PL intensity of each particle at 527 nm emission wavelength was measured at the same concentration ( $2.66 \times 10^{12}$  particles/mL). (**Inset:** PL intensity spectra of SiO<sub>2</sub>@InP QDs@SiO<sub>2</sub> NPs and hydrophilic CdSe/ZnS QDs).

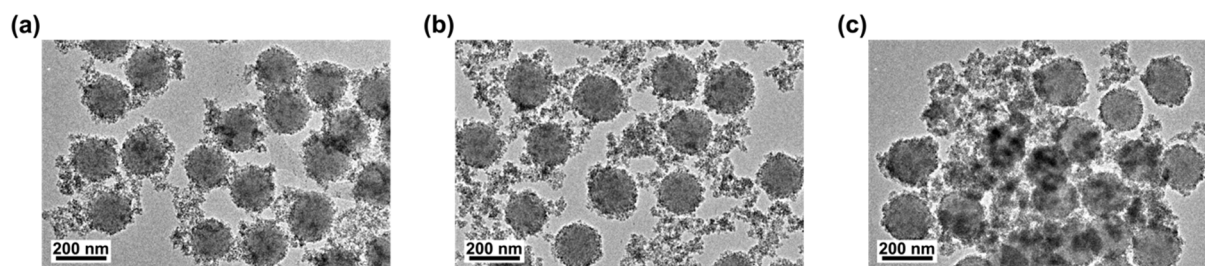

**Figure S4.** TEM images of SiO<sub>2</sub>@InP QDs@SiO<sub>2</sub> NPs by amount of added QDs. The amount of added QDs were (a) 1.4 mg, (b) 2.8 mg and (c) 5.6 mg per 1mg of SiO<sub>2</sub> NPs.

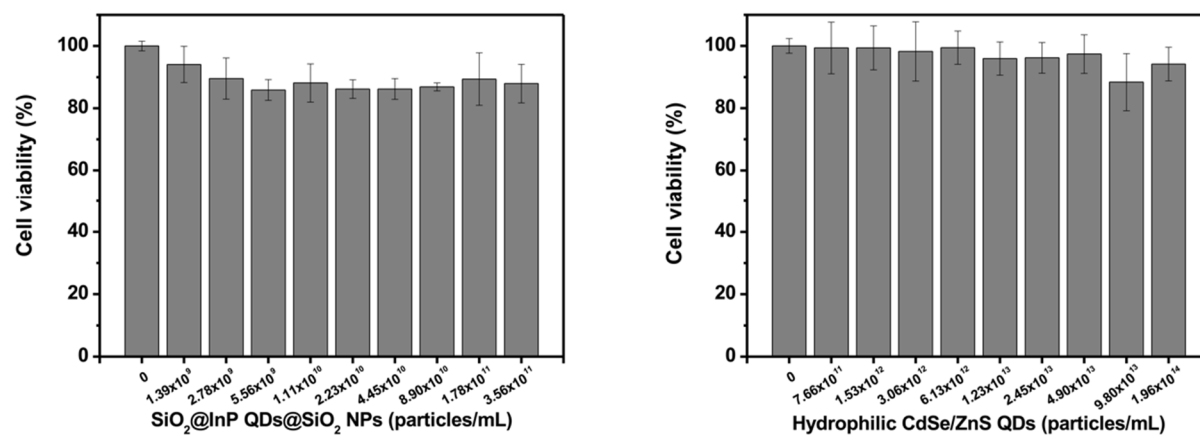

**Figure S5.** Cytotoxicity investigation of  $\text{SiO}_2@\text{InP QDs}@\text{SiO}_2$  NPs and hydrophilic CdSe/ZnS QDs. Cell viability of A549 cells in DMEM after 24 hours incubation with  $\text{SiO}_2@\text{InP QDs}@\text{SiO}_2$  NPs and hydrophilic CdSe/ZnS QDs.
